# Supplementary material for: Redefining the Prognostic Value of High-Sensitivity Troponin in COVID-19 Patients: The Importance of Concomitant Coronary Artery Disease
Source: PubMed Central journal article supplement (PMC7601151; doi:10.3390/jcm9103263), 2020-10-12
Supplement: jcm-09-03263-s001.pdf [file jcm-09-03263-s001.pdf]

SUPPLEMENTARY MATERIALS

**Tables S1-S2A-S2B**

Multivariable logistic regression analysis showing independent overall and by group predictors of in-hospital mortality (see also Figure 1 – panel A and B).

**Table 1.** Overall mortality predictors in multivariate logistical regression.

|                                                      | <b>OR</b> | <b>IQR</b> | <b>p</b> |
|------------------------------------------------------|-----------|------------|----------|
| <b>PaO<sub>2</sub>/FiO<sub>2</sub> &lt; 300 mmHg</b> | 8.0       | 4.5-14.2   | <0.001   |
| <b>Heart failure</b>                                 | 4.7       | 2.0-10.8   | <0.001   |
| <b>Age &gt; 65 years</b>                             | 3.2       | 1.7-6.2    | 0.001    |
| <b>Male gender</b>                                   | 2.6       | 1.4-4.8    | 0.002    |
| <b>Myocardial injury</b>                             | 2.5       | 1.3-4.5    | 0.003    |
| <b>CCS</b>                                           | 2.3       | 1.1-5.1    | 0.03     |
| <b>Diabetes</b>                                      | 2.1       | 1.2-4.0    | 0.015    |
| <b>Obesity</b>                                       | 1.6       | 0.6-4.1    | 0.312    |
| <b>COPD</b>                                          | 1.5       | 0.6-3.9    | 0.366    |
| <b>CKD</b>                                           | 1.1       | 0.5-2.4    | 0.785    |
| <b>Smoke</b>                                         | 0.8       | 0.4-1.8    | 0.603    |
| <b>Hypertension</b>                                  | 0.8       | 0.4-1.4    | 0.374    |

Table S2: stratification of in-hospital mortality between CCS and non-CCS patients;.

| <b>Table S2A: Mortality Predictors in CCS patients</b>     |           |            |          |
|------------------------------------------------------------|-----------|------------|----------|
|                                                            | <b>OR</b> | <b>IQR</b> | <b>p</b> |
| <b>Age &gt; 65 years</b>                                   | 4.2       | 0.8-23.3   | 0.100    |
| <b>Male gender</b>                                         | 5.4       | 1.5-19.5   | 0.011    |
| <b>Hypertension</b>                                        | 1.8       | 0.4-7.4    | 0.426    |
| <b>PaO<sub>2</sub>/FiO<sub>2</sub> &lt; 300 mmHg</b>       | 10.4      | 3.5-31.0   | <0.001   |
| <b>Heart failure</b>                                       | 2.9       | 0.9-9.2    | 0.064    |
| <b>CKD</b>                                                 | 1.1       | 0.3-3.9    | 0.857    |
| <b>COPD</b>                                                | 1.5       | 0.3-7.9    | 0.629    |
| <b>Myocardial injury</b>                                   | 0.6       | 0.2-1.9    | 0.409    |
| <b>Obesity</b>                                             | 3.3       | 0.5-20.0   | 0.197    |
| <b>Diabetes</b>                                            | 1.5       | 0.5-4.7    | 0.497    |
| <b>No previous revascularization</b>                       | 2.4       | 0.6-9.1    | 0.194    |
| <b>Table S2B: Mortality Predictors in non-CCS patients</b> |           |            |          |
|                                                            | <b>OR</b> | <b>IQR</b> | <b>p</b> |
| <b>Age &gt; 65 years</b>                                   | 2.8       | 1.3-6.2    | 0.01     |
| <b>Male gender</b>                                         | 2.0       | 0.9-4.3    | 0.078    |
| <b>Hypertension</b>                                        | 0.5       | 0.2-1.1    | 0.081    |
| <b>PaO<sub>2</sub>/FiO<sub>2</sub> &lt; 300 mmHg</b>       | 6.0       | 2.9-12.3   | <0.001   |
| <b>Heart failure</b>                                       | 16.3      | 3.4-77.3   | <0.001   |
| <b>CKD</b>                                                 | 1.1       | 0.4-3.2    | 0.879    |
| <b>COPD</b>                                                | 1.2       | 0.3-3.9    | 0.809    |
| <b>Myocardial injury</b>                                   | 5.0       | 2.4-10.6   | <0.001   |
| <b>Obesity</b>                                             | 1.5       | 0.4-5.2    | 0.543    |
| <b>Diabetes</b>                                            | 2.7       | 1.2-6.1    | 0.019    |
| <b>No previous revascularization</b>                       | NA        | NA         | NA       |

**Abbreviations:** CCS: chronic coronary syndromes; CKD: chronic kidney disease; COPD: chronic obstructive pulmonary disease; FiO<sub>2</sub>: fraction of inspired oxygen; IQR: interquartile range; NA: not applicable; OR: odds ratio; paO<sub>2</sub>: partial pressure of oxygen in arterial blood.

**Tables S3-S4A-S4B**

Multivariable logistic regression analysis showing independent overall and by group predictors of myocardial injury (see also Figure 1 – panel C and D).

**Table 3.** Overall Myocardial Injury Predictors in Myocardial Injury Predictors.

|                          | <b>OR</b> | <b>IQR</b>  | <b>p</b> |
|--------------------------|-----------|-------------|----------|
| <b>Diabetes</b>          | 3.42      | 1.85 – 6.36 | < 0.001  |
| <b>Age &gt; 65 years</b> | 3.28      | 1.68 – 6.40 | 0.001    |
| <b>Heart failure</b>     | 3.02      | 1.21 – 7.55 | 0.018    |
| <b>Hypertension</b>      | 2.10      | 1.18 – 3.75 | 0.012    |
| <b>CCS</b>               | 0.69      | 0.30 – 1.55 | 0.371    |
| <b>Smoke</b>             | 1.06      | 0.48 – 2.34 | 0.880    |
| <b>PaO2/FiO2</b>         | 1.00      | 0.99 – 1.00 | 0.090    |
| <b>Male gender</b>       | 0.96      | 0.55 – 1.68 | 0.896    |
| <b>Hb</b>                | 0.87      | 0.76 – 0.99 | 0.038    |
| <b>COPD</b>              | 1.01      | 0.40 – 2.48 | 0.998    |
| <b>CKD</b>               | 0.48      | 0.20 – 1.13 | 0.093    |
| <b>Obesity</b>           | 0.62      | 0.22 – 1.74 | 0.362    |

**Table 4.** stratification of myocardial injury between CCS and non-CCS patients.

| <b>Table S4A: Myocardial Injury Predictors in CCS patients</b>     |           |              |          |
|--------------------------------------------------------------------|-----------|--------------|----------|
|                                                                    | <b>OR</b> | <b>IQR</b>   | <b>p</b> |
| <b>Diabetes</b>                                                    | 3.41      | 1.02 – 11.38 | 0.046    |
| <b>Age &gt; 65 years</b>                                           | 0.71      | 0.12 – 4.11  | 0.706    |
| <b>Heart failure</b>                                               | 2.66      | 0.67 – 10.45 | 0.160    |
| <b>Smoke</b>                                                       | 1.87      | 0.52 – 6.73  | 0.339    |
| <b>Hypertension</b>                                                | 1.62      | 0.38 – 6.84  | 0.515    |
| <b>Male gender</b>                                                 | 0.57      | 0.15 – 2.01  | 0.370    |
| <b>Hemoglobin</b>                                                  | 0.84      | 0.61 – 1.16  | 0.288    |
| <b>PaO2/FiO2</b>                                                   | 1.01      | 0.99 – 1.00  | 0.171    |
| <b>COPD</b>                                                        | 1.24      | 0.26 – 5.79  | 0.785    |
| <b>CKD</b>                                                         | 0.65      | 0.14 – 2.92  | 0.572    |
| <b>Obesity</b>                                                     | 0.50      | 0.05 – 4.55  | 0.541    |
| <b>No previous revascularization</b>                               | 2.48      | 0.60 – 10.20 | 0.209    |
| <b>Table S4B: Myocardial Injury Predictors in non-CCS patients</b> |           |              |          |
|                                                                    | <b>OR</b> | <b>IQR</b>   | <b>p</b> |
| <b>Diabetes</b>                                                    | 3.06      | 1.35 – 6.82  | 0.007    |
| <b>Age &gt; 65 years</b>                                           | 3.92      | 1.84 – 8.40  | < 0.001  |
| <b>Heart failure</b>                                               | 5.23      | 0.98 – 28.04 | 0.052    |
| <b>Smoke</b>                                                       | 1.02      | 0.33 – 3.14  | 0.965    |
| <b>Hypertension</b>                                                | 1.85      | 0.93 – 3.67  | 0.078    |
| <b>Male gender</b>                                                 | 1.38      | 0.71 – 2.70  | 0.347    |
| <b>Hemoglobin</b>                                                  | 0.85      | 0.73 – 0.98  | 0.033    |

|                                        |      |             |       |
|----------------------------------------|------|-------------|-------|
| <b>PaO<sub>2</sub>/FiO<sub>2</sub></b> | 0.99 | 0.99 – 0.99 | 0.004 |
| <b>COPD</b>                            | 0.88 | 0.25 – 3.04 | 0.835 |
| <b>CKD</b>                             | 0.58 | 0.18 – 1.81 | 0.347 |
| <b>Obesity</b>                         | 0.87 | 0.12 – 14.4 | 0.819 |

**Abbreviations:** CCS: chronic coronary syndromes; CKD: chronic kidney disease; COPD: chronic obstructive pulmonary disease; FiO<sub>2</sub>: fraction of inspired oxygen; IQR: interquartile range; OR: odds ratio; paO<sub>2</sub>: partial pressure of oxygen in arterial blood.
